# Supplementary material for: Co-option of the PRDM14–CBFA2T complex from motor neurons to pluripotent cells during vertebrate evolution
Source: Oxford University Press journal article supplement (doi:10.1242/dev.168633), 2019-01-01
Supplement: dev168633supp.pdf [file dev168633supp.pdf]

**A**

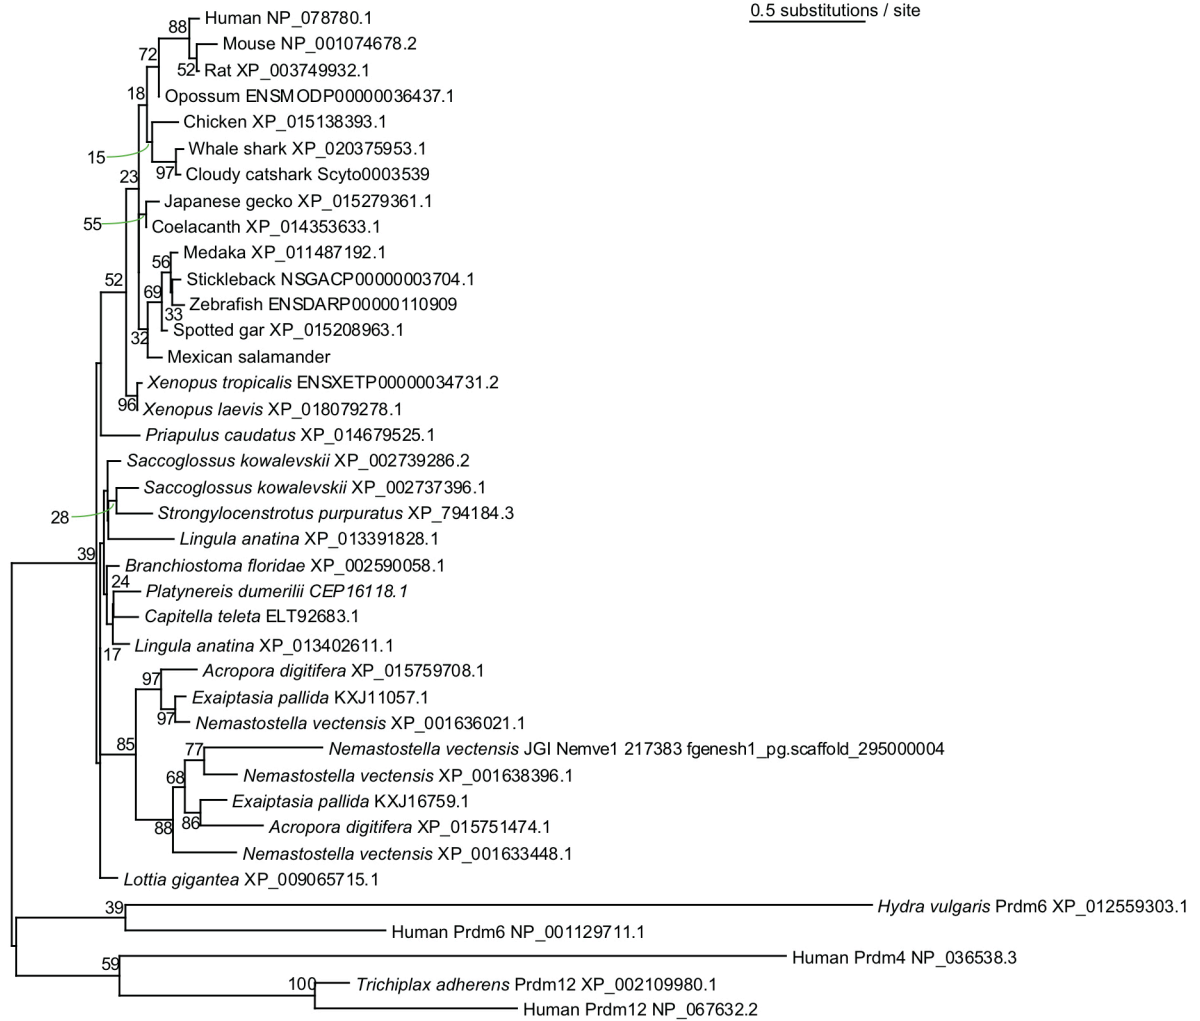

**B**

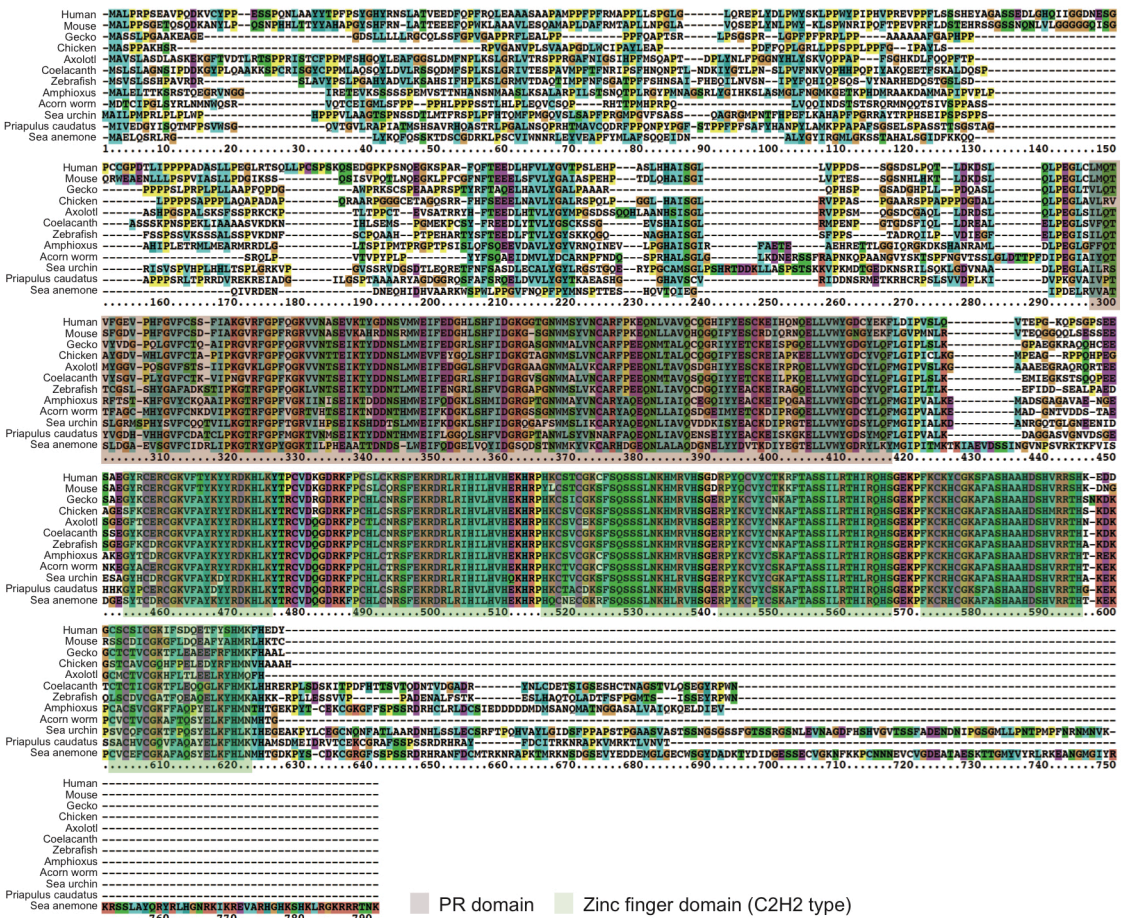

**Fig. S1. Molecular phylogeny and sequence conservation for the metazoan PRDM14.** (A) A maximum-likelihood tree was constructed using amino acid sequences of Prdm14 orthologues and human Prdm4/6/12, hydra Prdm6 and Trichoplax adherens Prdm12 as an outgroup. (B) Sequence alignment of PRDM14 orthologue proteins. The pink restriction box indicates the position of the PR domain and the green restriction box indicates the position of the zinc finger domain.

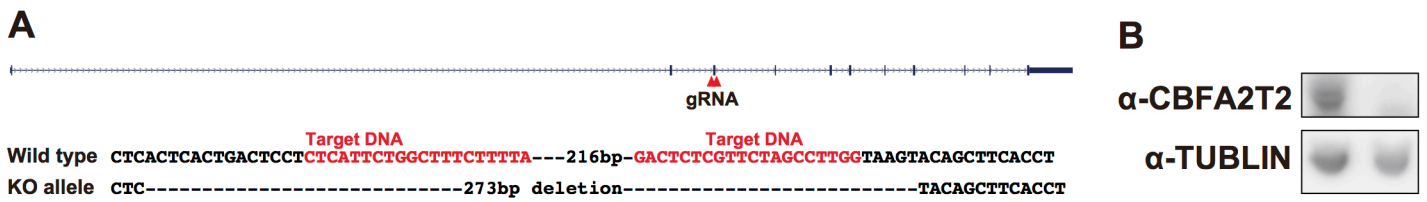

**Fig. S2. Establishment of *mCbfa2t2* KO cell line using CRISPR/Cas9 system. (A) CRISPR design and the deletion sequence of *mCbfa2t2* KO cell line. (B) Western blot analysis of CBFA2T2.**

**Table S1. Primer lists for qRT-PCR, bisulfite sequencing and ChIP-qPCR.**

## qRT-PCR

| Gene                | Strand  | Sequence(5'-3')           |
|---------------------|---------|---------------------------|
| <i>Oct3/4</i>       | Forward | CTCTCCCATGCATTCAAAGCTG    |
|                     | Reverse | CCCCTGTTGTGCTTTTAATCC     |
| <i>Nanog</i>        | Forward | TTTGGAGGTGAATTTGGAAGC     |
|                     | Reverse | TCACCTGGTGGAGTCACAGAG     |
| <i>Esrrb</i>        | Forward | CGTGTGACAAGGAGACAGGAG     |
|                     | Reverse | TCCAGCCACAACGTCATTATC     |
| <i>Tcl1</i>         | Forward | TGGCCTCACTAGAACAAGAGG     |
|                     | Reverse | CTCGGTCAAGGATGGAAGC       |
| <i>Klf2</i>         | Forward | CCCAGGAAAGAAGACAGGAG      |
|                     | Reverse | AGGCATTTCTCACAAGGCATC     |
| <i>Tcl1</i>         | Forward | TGGCCTCACTAGAACAAGAGG     |
|                     | Reverse | CTCGGTCAAGGATGGAAGC       |
| <i>Tbx3</i>         | Forward | TGATGTTTTAAGAGCCGATGC     |
|                     | Reverse | AGGATAATGGGACTTCCGTTG     |
| <i>Klf4</i>         | Forward | GACCAGGATTCCCTTGAATTG     |
|                     | Reverse | ACCAAGCACCATCATTTAGGC     |
| <i>Klf5</i>         | Forward | TGGAAGTCCCGATAGACAAGC     |
|                     | Reverse | GTGGCAGGTAAATTTGGGTTG     |
| <i>Dnmt3a2</i>      | Forward | CAGACGGGCAGCTATTTACAG     |
|                     | Reverse | TGTTTCTCTCCACAGCATTC      |
| <i>Dnmt3b</i>       | Forward | CTCGCAAGGTGTGGGCTTTTGTAAC |
|                     | Reverse | CTGGGCATCTGTCATCTTTGCACC  |
| <i>Dnmt3l</i>       | Forward | CTGGTGAAGAACTGCCTTCTC     |
|                     | Reverse | AAACTGTGGAGGGAAGAGACC     |
| <i>Prdm14 CDS</i>   | Forward | TGTGGTACGGAAATGGCTATG     |
|                     | Reverse | AAACACCTTTCCACAGCGTTC     |
| <i>Prdm14 3'UTR</i> | Forward | GGAATCCATTCAGACCAGGAG     |
|                     | Reverse | GCACATAGTCGCTGGCTACAG     |
| <i>Gata6</i>        | Forward | TTGCCTCCAAATCATGTGCTTC    |
|                     | Reverse | GCCTCCAGGATAGACCAAATG     |
| <i>Fgf5</i>         | Forward | ATGAGTGCATCTGCTCTGCTC     |
|                     | Reverse | CGTCTGTGGTTTCTGTTGAGG     |
| <i>T</i>            | Forward | AAGGACAGAGAGACGGCTGTG     |
|                     | Reverse | AAAGTAGGACAGGGGGTGGAC     |
| <i>Cdx2</i>         | Forward | GTAATGCCAGAGCCAACCTG      |
|                     | Reverse | GGCTTGTTTGGCTCGTTACAC     |
| <i>Dazl</i>         | Forward | GATGGACATGAGATCATTGGAC    |
|                     | Reverse | ATACCAGGGAGCAATCCTGAC     |
| <i>Sycp3</i>        | Forward | CGAGCAGTTCATAAAGAGTTTG    |
|                     | Reverse | TCTTGCTGCTGAGTTTCCATC     |

|             |         |                       |
|-------------|---------|-----------------------|
| <i>Asz1</i> | Forward | GAGTGGGCTTCTCCCAGAAA  |
|             | Reverse | GGTCATTTTCCCGCTCATTC  |
| <i>Gja1</i> | Forward | GTGCAAGTGTGTAAGCGTGTG |
|             | Reverse | CACAAAGATCCATGAGGAAGG |

## Bisulfite sequencing

| Gene         | Strand  | Sequence(5'-3')                |
|--------------|---------|--------------------------------|
| <i>Tcl1</i>  | Forward | GAAATAGGAGGGTTAGGGAGATTTTAGATG |
|              | Reverse | TTTCTTTTAAACACCAACATTTAAACCCAT |
| <i>Dazl</i>  | Forward | CCACTTCTCTTTTCTACACC           |
|              | Reverse | CCACTCTTATCCTCCAAACC           |
| <i>Sycp3</i> | Forward | AAGGGTTAGGTTTTTTTAGA           |
|              | Reverse | AACTTCCTACCTAAATACCCAA         |
| <i>Asz1</i>  | Forward | TTGGAGAGAAAAAGATTTTT           |
|              | Reverse | TACCATAACTCCAAACTATTCT         |

## ChIP-qPCR

| Gene                     | Strand  | Sequence(5'-3')           |
|--------------------------|---------|---------------------------|
| <i>Esrb</i>              | Forward | GGTTGCTTTCTTTTGCTGGTG     |
|                          | Reverse | TGATCCTTTGGAGTGGAGGAC     |
| <i>Tfcp2l1</i>           | Forward | TCATCCTTATCCTCCCAGCAG     |
|                          | Reverse | GGGAAGAGGAAAGTGGATTC      |
| <i>Fgfr1</i>             | Forward | GCTTGGCCTTGGATGAATTGTTGGC |
|                          | Reverse | AGCCAGGTTGGCCTTTTGTCT     |
| <i>Dnmt3b (-10.1 kb)</i> | Forward | CAGGAAATGCGTGCCTAGAGG     |
|                          | Reverse | AGGCTTTTCACTTGAGGGCTG     |
| <i>Dnmt3b (-6.3 kb)</i>  | Forward | CTGCCACTACCACCAACAAAC     |
|                          | Reverse | TTTCCACAGGAACACTCATGC     |
